# Supplementary material for: Catalytic Performance of Pentacoordinate Iron(II) Complexes with Modified Bis(imino)pyridine Ligands for Ethylene Oligomerization
Source: Research Square preprint supplement (doi:10.21203/rs.3.rs-6657597/v1), 2025-05-23
Supplement: Supplementary file 1 [file 9d2aa9acea423b7cd13e659f.docx]

**Figure SI-4:** 13C CPMAS NMR spectrum of polyethylene obtained with **C1** at 60°C, 5atm (SI-Table 8, entry 5).

**Figure SI-5:** 13C CPMAS NMR spectrum of polyethylene obtained with **C2** at 60°C, 5atm (SI-Table 8, entry 6).

**Figure SI-6:** 13C CPMAS NMR spectrum of polyethylene obtained with **C7** at 60°C, 5atm (SI-Table 8, entry 7).

**Figure SI-7:** 13C CPMAS NMR spectrum of polyethylene obtained with **C8** at 60°C, 5atm (SI-Table 8, entry 8).

**Figure SI-8:** FTIR spectra of polyethylene obtained with **C1**, **C2**, **C7** and **C8** at 30°C, 1atm (SI-Table 8, entries 1 – 4).
